# Supplementary material for: Visible-light photocatalytic capability and the mechanism investigation of a novel PANI/Sn3O4 p–n heterostructure
Source: Royal Society of Chemistry journal article supplement (doi:10.1039/c9ra07562c), 2019-01-01
Supplement: c9ra07562c1.pdf [file c9ra07562c1.pdf]

## Supplementary Information

### Visible-light photocatalytic capability and the mechanism investigation of a novel PANI/Sn<sub>3</sub>O<sub>4</sub> p-n heterostructure

Manfei Lv,<sup>ab</sup> Liuqing Yang,<sup>\*b</sup> Xiangliang Wang,<sup>b</sup> Xinlei Cheng,<sup>b</sup> Yan Song,<sup>b</sup> Yinkun Yin,<sup>b</sup> Huimin Liu,<sup>c</sup> Yongjun Han,<sup>b</sup> Kesheng Cao,<sup>d</sup> Wei Ma,<sup>b</sup> Guang Qi<sup>b</sup> and Songtian Li<sup>\*ab</sup>

---

*a. College of Chemistry, Zhengzhou University, Zhengzhou, 450001, China*

*b. College of Chemistry and Environmental Engineering, Pingdingshan University, Pingdingshan, 467000, China*

*c. TJU-NIMS International Collaboration Laboratory, School of Material Science and Engineering, Tianjin University, Tianjin 300072, P. R. China*

*d. Analytical Instrumentation Center, Pingdingshan University, Pingdingshan, 467000, China*

*Corresponding Author E-mail: yangliuqing\_pdsu@163.com; lisongtian@126.com.*

**Table S1** The specific surface area, average pore size, and total pore volume of as-prepared samples.

| Photocatalyst                        | PANI  | Sn <sub>3</sub> O <sub>4</sub> | PANI/Sn <sub>3</sub> O <sub>4</sub> -5% | PANI/Sn <sub>3</sub> O <sub>4</sub> -10% | PANI/Sn <sub>3</sub> O <sub>4</sub> -30% | PANI/Sn <sub>3</sub> O <sub>4</sub> -50% |
|--------------------------------------|-------|--------------------------------|-----------------------------------------|------------------------------------------|------------------------------------------|------------------------------------------|
| BET Surface Area (m <sup>2</sup> /g) | 53.88 | 24.62                          | 29.74                                   | 35.56                                    | 38.51                                    | 39.10                                    |
| Average Pore Size (nm)               | 22.30 | 10.02                          | 9.77                                    | 12.07                                    | 15.36                                    | 19.73                                    |
| Pore Volume (cm <sup>3</sup> /g)     | 0.28  | 0.09                           | 0.11                                    | 0.15                                     | 0.19                                     | 0.22                                     |

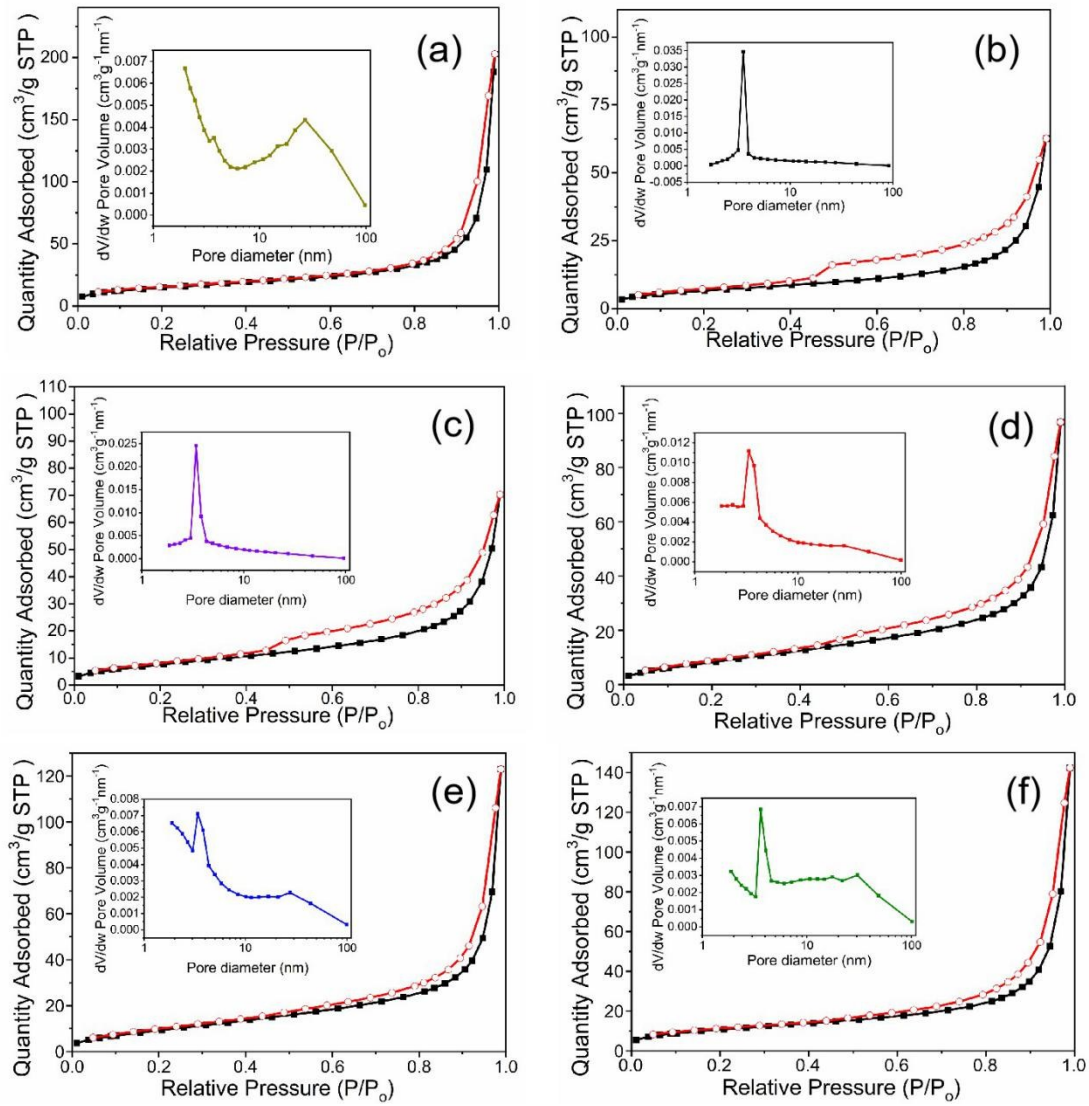

**Fig. S1** (a-f)  $N_2$  adsorption and desorption isotherm of PANI,  $Sn_3O_4$  and PANI/ $Sn_3O_4$  heterostructure

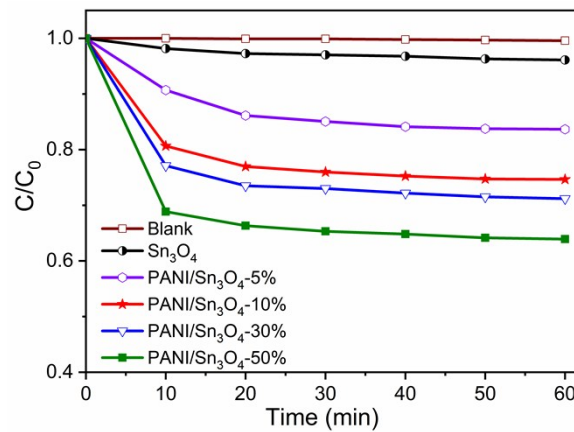

**Fig. S2** Dark adsorption Sn<sub>3</sub>O<sub>4</sub> and PANI/Sn<sub>3</sub>O<sub>4</sub> composites
